# Supplementary material for: Reassessing the contribution of the Na+/H+ exchanger Nhe3b to Na+ uptake in zebrafish (Danio rerio) using CRISPR/Cas9 gene editing
Source: Oxford University Press journal article supplement (doi:10.1242/jeb.215111), 2019-01-01
Supplement: jeb215111supp.pdf [file jeb215111supp.pdf]

**Table S1. Sequence of the DNA construct used to transcribe the *slc9a3.2* (*nhe3b*) and *rhcgb* single guide RNA (sgRNA), primer sequences used in the generation of the sgRNA DNA construct, and primer sequences used for mutant genotyping.** In the DNA construct, underlined nucleotides represent the T7 RNA polymerase promoter, bolded sequence represent the CRISPR/Cas9 target sequence (specific to either *slc9a3.2* or *rhcgb*), and italicized nucleotides represent the Cas9 binding sequence. The two template oligos formed the initial DNA template through partial complementary binding, and the forward and reverse amplification oligos amplified the template.

| <b>DNA Construct Sequence</b>                                                                                                   |                                                                                  |
|---------------------------------------------------------------------------------------------------------------------------------|----------------------------------------------------------------------------------|
| GCGTAATACGACTCACTATANNNNNNNNNNNNNNNNNNNNGTTTTAGAGCTAGAA<br>ATAGCAAGTTAAAATAAGGCTAGTCCGTTATCAACTTGAAAAAGTGGCACCGAGTCGGT<br>GCTTT |                                                                                  |
| <b>Primer Name</b>                                                                                                              | <b>Sequence (5'-3')</b>                                                          |
| <i>slc9a3.2</i> template oligo                                                                                                  | GCGTAATACGACTCACTATATGCATTACATGAGGCTGCTG<br>TTTTAGAGCTAGAAATAGC                  |
| <i>rhcgb</i> template oligo                                                                                                     | GCGTAATACGACTCACTATAGGGCAACTGCTTCGGCTCCA<br>TTTTAGAGCTAGAAATAGC                  |
| Universal template oligo                                                                                                        | AAGCACCGACTCGGTGCCACTTTTTCAAGTTGATAACGGACT<br>AGCCTTATTTAACTTGCTATTTCTAGCTCTAAAA |
| Forward amplification oligo                                                                                                     | GCGTAATACGACTCACTATAG                                                            |
| Reverse amplification oligo                                                                                                     | AAAGCACCGACTCGGTGCCAC                                                            |
| <i>slc9a3.2</i> forward sequencing primer                                                                                       | GAAGAACCTCCTGAAACACCAC                                                           |
| <i>slc9a3.2</i> reverse sequencing primer                                                                                       | TGATAGTGGCAGAATGACTGCT                                                           |
| <i>rhcgb</i> forward sequencing primer                                                                                          | TGTGGCACTTCTTGAAAGTGAT                                                           |
| <i>rhcgb</i> reverse sequencing primer                                                                                          | GCGGGTAAACTGAGTCTGATGT                                                           |

**Table S2. Primers used for real-time PCR.**

| <b>Name</b>                  | <b>Sequence (5'-3')</b>      | <b>Genbank Accession Number</b> | <b>Reference</b>       |
|------------------------------|------------------------------|---------------------------------|------------------------|
| <i>actb2</i><br>forward      | TTACCACTTCACGC<br>CGACTC     | NM_131263.1                     | Present study          |
| <i>actb2</i><br>reverse      | GTCACCTTCACCGTT<br>CCAGT     |                                 |                        |
| <i>slc9a3.2</i><br>forward   | TGCAGACAGCGCCT<br>CTAGC      | NM_001113479.1                  | Kwong and Perry (2016) |
| <i>slc9a3.2</i><br>reverse   | TGTGGCCTGTCTCTG<br>TTTGC     |                                 |                        |
| <i>atp6v1aa</i><br>forward   | GAGGAACCACTGCC<br>ATTCCA     | NM_201135.2                     | Kwong and Perry (2016) |
| <i>atp6v1aa</i><br>reverse   | CAACCCACATAAAT<br>GATGACATCG |                                 |                        |
| <i>asic4b</i><br>forward     | GAACTTGACGTCGG<br>GGTCTT     | NM_214786.1                     | Present study          |
| <i>asic4b</i><br>reverse     | ACCGGTTTCACATG<br>AGGTCC     |                                 |                        |
| <i>slc12a10.2</i><br>forward | GCCCCAAAGTTTT<br>CCAGTT      | NM_001045001.1                  | Kwong and Perry (2016) |
| <i>slc12a10.2</i><br>reverse | TAAGCACGAAGAGG<br>CTCCTTG    |                                 |                        |

**Table S3. Predicted amino acid sequences of nhe3b and rhcgb KO mutants based on Sanger sequencing.**

| <b>Genotype</b> | <b>Predicted amino acid sequence</b>               |
|-----------------|----------------------------------------------------|
| <b>nhe3b KO</b> | MAFSTLLLAFLVVSGA*STOP                              |
| <b>rhcgb KO</b> | MGNCFGFQGHLRPAKKHQHQQTQFTRGVLRLAGVHDHTFRSVCAV*STOP |

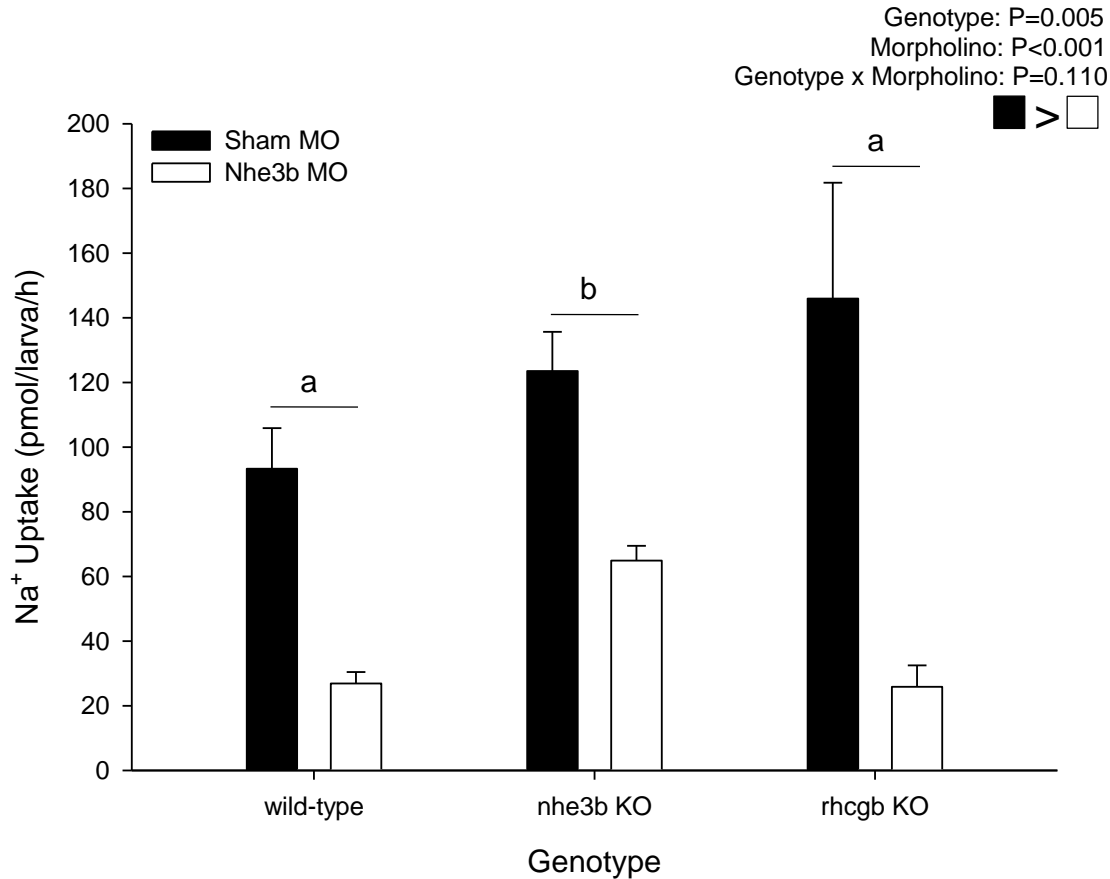

**Fig. S1. Na<sup>+</sup> uptake in response to a splice-blocking Nhe3b morpholino in wild-type, nhe3b KO, and rhcgb KO larvae.** Na<sup>+</sup> uptake rates in 4 dpf wild-type, nhe3b KO, and rhcgb KO larvae treated with sham (filled bars) or a splice-blocking Nhe3b morpholino (open bars; 5'-GCTCAGTGACTGGAAAGAGAAATA-3'; Kumai and Perry, 2011) morpholino (MO) and reared and assayed in 10  $\mu$ mol/L Na<sup>+</sup>. Letters above means that differ from one another represent a statistically significant effect of genotype within a morpholino treatment and boxes in the upper right corner of the panels depict the overall statistical effect of morpholino treatment as determined by a two-way ANOVA followed by a Holm-Sidak post-hoc test. (n=6-12)
